# Supplementary material for: Genome-Wide Analysis of the BBX Genes in Platanus × acerifolia and Their Relationship with Flowering and/or Dormancy
Source: MDPI journal article supplement (doi:10.3390/ijms24108576), 2023-05-11
Supplement: s1 [file s1]

Supplementary Materials

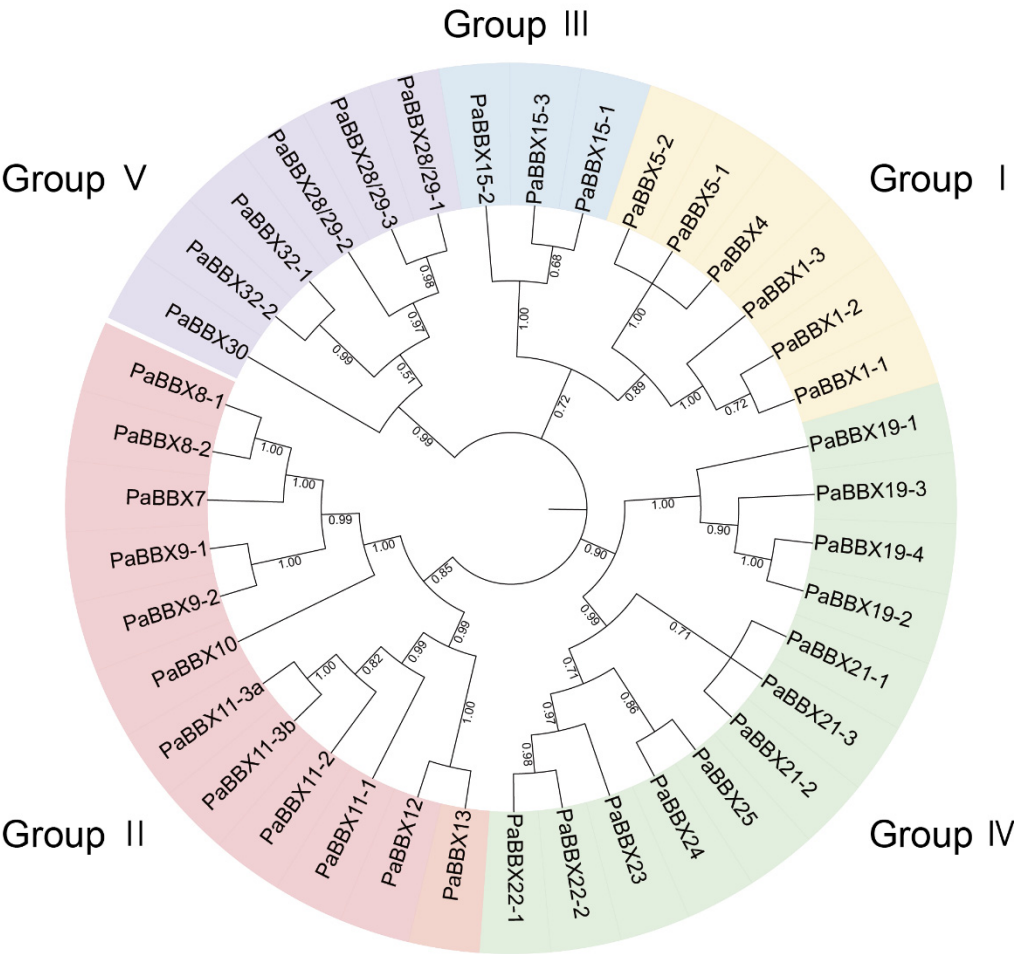

**Figure S1.** Phylogenetic tree of PaBBX proteins. Yellow, pink, blue, green, and purple represent groups I, II, III, IV, V, respectively.

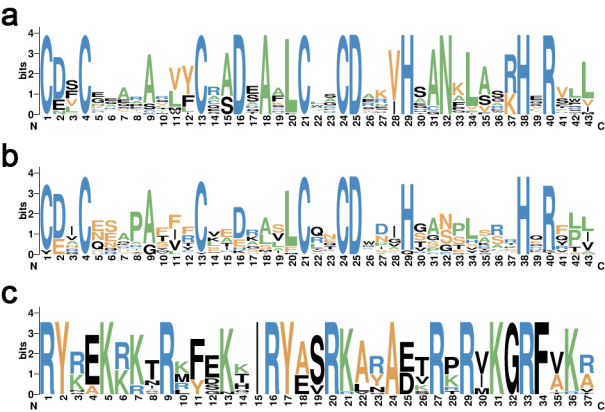

**Figure S2.** Logos of the conserved domains in the PaBBX proteins. (a), (b) and (c) are the protein alignment of the B-BBOX1, B-BBOX2 and CCT domain, respectively.

The x-axis shows the conserved sequences of the domain. The y-axis represents the conservation rate of each amino acid.

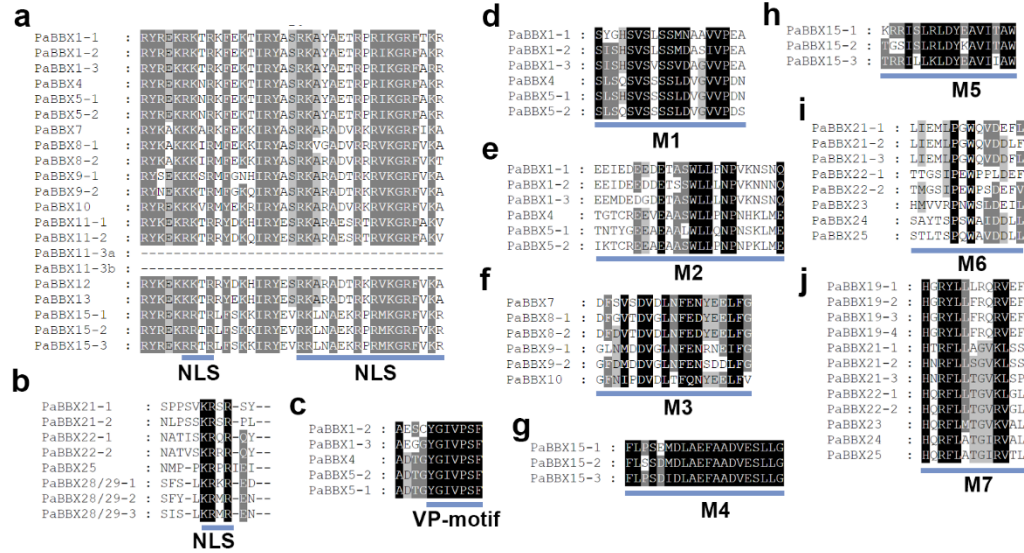

**Figure S3.** Multiple sequence alignments conserved domain of PaBBX proteins. **(a)** and **(b).** Alignment of the nuclear localization signals (NLSs) domain of PaBBX proteins. **(c).** Alignment of the VALINE-PROLINE (VP) domain of PaBBX proteins. **(d)-(j).** Alignment of the M1-M7 domains of PaBBX proteins. Conserved amino acids were marked with blue lines.
