# Supplementary material for: Genome-Wide Analysis of the BBX Genes in Platanus × acerifolia and Their Relationship with Flowering and/or Dormancy
Source: Int J Mol Sci. 2023 May 11;24(10):8576. doi: 10.3390/ijms24108576 (PMC10218012; doi:10.3390/ijms24108576)
Supplement: Supplementary file 1 [file ijms-24-08576-s001.zip › ijms-2326191-supplementary tables.xlsx]

## Sheet: Table S1
Table S1. The Ka/Ks values of PaBBX genes duplication pairs.
Seq_1	Seq_2	Ka	Ks	Ka_Ks
PaBBX1-3	PaBBX1-1	0.144147	0.427795	0.336953
PaBBX1-2	PaBBX1-1	0.121893	0.473434	0.257467
PaBBX4	PaBBX5-1	0.112814	0.485315	0.232455
PaBBX4	PaBBX5-2	0.0850579	0.539832	0.157564
PaBBX5-1	PaBBX5-2	0.09357	0.5609	0.166821
PaBBX8-2	PaBBX7	0.107907	0.311388	0.346535
PaBBX9-2	PaBBX9-1	0.19525	0.483587	0.403755
PaBBX13	PaBBX12	0.161087	0.429683	0.374896
PaBBX15-1	PaBBX15-3	0.138965	0.529845	0.262275
PaBBX15-2	PaBBX15-3	0.142468	0.596475	0.23885
PaBBX15-1	PaBBX15-2	0.118033	0.556578	0.212069
PaBBX19-1	PaBBX19-2	0.0986478	0.454056	0.217259
PaBBX19-1	PaBBX19-3	0.102068	0.409558	0.249215
PaBBX19-3	PaBBX19-2	0.0718088	0.452379	0.158736
PaBBX21-3	PaBBX21-2	0.188898	0.593767	0.318135
PaBBX21-3	PaBBX21-1	0.186582	0.419632	0.444632
PaBBX21-1	PaBBX21-2	0.191739	0.464582	0.412713
PaBBX22-1	PaBBX22-2	0.132917	0.400211	0.332117
PaBBX25	PaBBX24	0.0974864	0.459677	0.212076
PaBBX28/29-1	PaBBX28/29-3	0.171719	0.38676	0.443992
PaBBX28/29-1	PaBBX28/29-2	0.139371	0.355338	0.392221
PaBBX28/29-2	PaBBX28/29-3	0.139995	0.371989	0.376343
PaBBX32-1	PaBBX32-2	0.195528	0.522419	0.374274

## Sheet: Table S2
Table S2. Intron analysis of BBX gene family in P. acerifolia.
Gene	intron number	Intron length(bp)	Intron name
PaBBX9-2	Second	22891	PaBBX9-2-IN2
PaBBX10	First	23518	PaBBX10-IN1
PaBBX10	Second	19520	PaBBX10-IN2
PaBBX22-1	First	20385	PaBBX22-1-IN1
PaBBX22-1	Second	9819	PaBBX22-1-IN2
PaBBX22-2	First	16635	PaBBX22-2-IN1
PaBBX23	First	12500	PaBBX23-IN1

## Sheet: Table S3
Table S3.The cie-element analysis of PaBBX genes with ultralong introns.
Element	Function	Number
		PaBBX9-2-IN2	PaBBX10-IN1	PaBBX10-IN2	PaBBX22-1-IN1	PaBBX22-1-IN2	PaBBX22-2-IN1	PaBBX23-IN1
3-AF1 binding site	light responsive element					2	1
3-AF3 binding site	part of a conserved DNA module array (CMA3)	1	1	1		1
AAAC-motif	light responsive element		1		1
A-box	cis-acting regulatory element				2			9
ABRE	cis-acting element involved in the abscisic acid responsiveness	12	11	10	9	5	9	2
ACE	cis-acting element involved in light responsiveness	2	3	1	3		1
AE-box	part of a module for light response	6	3	10	8	2	7	11
ARE	cis-acting regulatory element essential for the anaerobic induction	28	27	15	21	9	23
AT1-motif	part of a light responsive module						3	3
ATC-motif	part of a conserved DNA module involved in light responsiveness			4	1		2	1
ATCT-motif	part of a conserved DNA module involved in light responsiveness	7	2	1	1	3	2	1
AT-rich element	binding site of AT-rich DNA binding protein (ATBP-1)	3	5	5			1	2
AT-rich sequence	element for maximal elicitor-mediated activation (2copies)						1
AuxRE	part of an auxin-responsive element			1			2	2
AuxRR-core	cis-acting regulatory element involved in auxin responsiveness	2	2	2		1	11	6
Box 4	part of a conserved DNA module involved in light responsiveness	14	23	16	11	6
Box II	part of a light responsive element	1		1
CAAT-box	common cis-acting element in promoter and enhancer regions	165	165	163	149	73	155	117
CAG-motif	part of a light response element	1		9	1		4
CAT-box	cis-acting regulatory element related to meristem expression	5	9		4	1		4
C-box	cis-acting regulatory element involved in light responsiveness			1
CCAAT-box	MYBHv1 binding site	1	9	3	1	1	1
CGTCA-motif	cis-acting regulatory element involved in the MeJA-responsiveness			12	6	5	7	2
chs-CMA1a	part of a light responsive element	1	2	1	2		2
chs-CMA2a	part of a light responsive element	2					1	1
chs-Unit 1 m1	part of a light responsive element	1					1
circadian	cis-acting regulatory element involved in circadian control	3	2		1	1	4
GA-motif	part of a light responsive element	1	1	2	1		5	4
GARE-motif	gibberellin-responsive element		1	4	1	1	2	2
GATA-motif	part of a light responsive element	16	2	14	5	5	11	5
G-Box	cis-acting regulatory element involved in light responsiveness	13	9	13	11	7	14	9
GC-motif	enhancer-like element involved in anoxic specific inducibility	15			1		3
GCN4_motif	cis-regulatory element involved in endosperm expression		5	2	2	1	1	4
GT1-motif	light responsive element	11	21	7	3	12	17	6
HD-Zip 1	element involved in differentiation of the palisade mesophyll cells		1			1	1
I-box	part of a light responsive element	6	12	3	7	4	6	4
LAMP-element	part of a light responsive element	4	1	2	1		2
LS7	part of a light responsive element		1
LTR	cis-acting element involved in low-temperature responsiveness	7	3	5	2	3	5	2
MBS	MYB binding site involved in drought-inducibility	5	14	7	1	6	1	4
MBSI	MYB binding site involved in flavonoid biosynthetic genes regulation				1		1	1
MRE	MYB binding site involved in light responsiveness	7	7	6	6	2	11	7
MSA-like	cis-acting element involved in cell cycle regulation				1	1
O2-site	cis-acting regulatory element involved in zein metabolism regulation	17	8	9	7	3	7	5
P-box	gibberellin-responsive element	5	7	6	2		7	4
RY-element	cis-acting regulatory element involved in seed-specific regulation		2	2			2	1
Sp1	light responsive element	1	1		1			1
TATC-box	cis-acting element involved in gibberellin-responsiveness	4	4		4	3	4	5
TCA-element	cis-acting element involved in salicylic acid responsiveness	8	7	10	1	5	5	7
TCCC-motif	part of a light responsive element	8	8	5	6	1	6	3
TC-rich repeats	cis-acting element involved in defense and stress responsiveness	6	7		4		11	1
TCT-motif	part of a light responsive element	20	14	14	9	3	15	5
TGACG-motif	cis-acting regulatory element involved in the MeJA-responsiveness	14	9	12	6	5	7	4
TGA-element	auxin-responsive element	4	1	2	7	1		2
Unnamed__1	60K protein binding site			1
motif I	cis-acting regulatory element root specific					1		2
WUN-motif	wound-responsive element

## Sheet: Table S4
Table S4. Promoter analysis of BBX gene family in P. acerifolia.
Element	Function	Number
		PaBBX1-1	PaBBX1-2	PaBBX1-3	PaBBX4	PaBBX5-1	PaBBX5-2	PaBBX7	PaBBX8-1	PaBBX8-2	PaBBX9-1	PaBBX9-2	PaBBX10	PaBBX11-1	PaBBX11-2	PaBBX11-3a	PaBBX11-3b	PaBBX12	PaBBX13	PaBBX15-1	PaBBX15-2	PaBBX15-3	PaBBX19-1	PaBBX19-2	PaBBX19-3	PaBBX19-4	PaBBX21-1	PaBBX21-2	PaBBX21-3	PaBBX22-1	PaBBX22-2	PaBBX23	PaBBX24	PaBBX25	PaBBX28/29-1	PaBBX28/29-2	PaBBX28/29-3	PaBBX30	PaBBX32-1	PaBBX32-2
3-AF1 binding site	light responsive element								1						1										1			1												1
3-AF3 binding site	part of a conserved DNA module array (CMA3)		1																							1		1
4cl-CMA1b	light responsive element																										1
AAAC-motif	light responsive element																																							2
AAGAA-motif		1	1	4	6	3	7	2		1	3	2		1	2	2	2	2	1	1		4		3	1	1		1			7	2	1	5	1	2		8		1
A-box	cis-acting regulatory element										1		3											1	1			1	1						1		1		1	2
ABRE	cis-acting element involved in the abscisic acid responsiveness	1	6	3	16	4	4	1	2	1	3	5	9	5		2	2	4	2	9	3	1	6		1	1	1	2	2	4	3	2		3	1	6	11	4	11	15
ABRE2						1																	1																2	1
ABRE3a			4	1	1		1	1			1	2	2	1						1	1					1			2			1		2		1	1	1		1
ABRE4			4	1	1		1	1			1	2	2	1						1	1					1			2			1		2		1	1	1		1
ACE	cis-acting element involved in light responsiveness					1			1											1														2			1			1
AC-I																1	1								1
AC-II																												1			1
AE-box	part of a module for light response	1	1		1		1	1				1	3			1	1	1		1				1			1			3								1	1
AP-1									2	1																	1
ARE	cis-acting regulatory element essential for the anaerobic induction	1		3	1	1	1	3		2	3	5		2	2			1	1	1	6	2	1	2	1	2	1	3	1	5	1	1		3	1		1	6	3	6
as-1			1		4	3	2		2	1	1	3	2		2			1	4	1	1	1	2	4	1	1	2	2		1	2		2	1	4	1	3		5	3
AT~ABRE													2							1																				1
AT~TATA-box			1	1			4		1	1	4	10				3	3		2		2				1	21	7	14	8	1	2	2						5
ATC-motif	part of a conserved DNA module involved in light responsiveness				1		1																							1	1
ATCT-motif	part of a conserved DNA module involved in light responsiveness					1					1		1		1	2	2		1			1												1						1
AT-rich element	binding site of AT-rich DNA binding protein (ATBP-1)			2			1				1	1									1										1
AT-rich sequence	element for maximal elicitor-mediated activation (2copies)																														1
AuxRR-core	cis-acting regulatory element involved in auxin responsiveness	1	1		1							1			1									1								1	1				1	2
Box 4	part of a conserved DNA module involved in light responsiveness	3	3	1	1	2			1	1	1	3	1	6		2	2	2	1	3	4	2		1	1	1		1			2			2	1			6		2
Box II	part of a light responsive element					1							1																				1						2	1
Box II -like sequence	cis-acting regulatory element							1
box S								1		1													2	1	1		1	2				1						1		1
CAAT-box	common cis-acting element in promoter and enhancer regions	23	30	31	32	27	31	34	35	33	32	36	34	44	29	36	36	46	37	43	50	46	29	31	17	31	37	29	33	36	35	44	23	26	28	18	25	113	29	20
CARE					1				1		2									1										1						1		1
CAT-box	cis-acting regulatory element related to meristem expression		1			1		1	1	1	1		2	2						1		1		2	1	1		2				1	2	1		1		1
CCAAT-box	MYBHv1 binding site				1	1					1			1				1			1		1					1					1	1		1		1
CCGTCC motif											1		3											1	1			1	1						1		1		1	2
CGTCA-motif	cis-acting regulatory element involved in the MeJA-responsiveness		2		4	3	2		2	1	1	3	1		2			1	4	1	1	1	2	4	1	1	2	2		1	2		2	1	4	1	3		5	3
chs-CMA1a	part of a light responsive element								1										1					1
chs-CMA2a	part of a light responsive element		1																					1		1			1									1
chs-Unit 1 m1	part of a light responsive element	1																							1													1
circadian	cis-acting regulatory element involved in circadian control		1															1			3													1	1			1	1
dOCT																									1
DRE core					1		2			1			1	1					1						1														2
DRE1																													1				1
E2Fb																		1
ERE									1	1				3		1	1	1		1		2	1	1	3	1	1		1						2		1	3	1
F-box					1																					1					1
GA-motif	part of a light responsive element		1
Gap-box	part of a light responsive element													3
GARE-motif	gibberellin-responsive element		1					1			1	1	2								1				1			1								1			1
GATA-motif	part of a light responsive element		1			1			1			2	2	1					1				1	2	1	2	2	2		2	1	1		2	1		2	2
GATT-motif	part of a light responsive element
G-Box	cis-acting regulatory element involved in light responsiveness	2	6	5	16	8	4	1	2	1	5	7	8	4		2	2	2	1	7	2	2	9	1	2	1		1	3	4	4	2		5		6	12	5	14	15
GC-motif	enhancer-like element involved in anoxic specific inducibility				1		2				1												1					1								1
GCN4_motif	cis-regulatory element involved in endosperm expression		1		1																								1			2	2					2	1
GT1-motif	light responsive element	1	3	2	2			1	1	1	1		4	2	1			1	1		1	1		2		3	1	7			2	1			1		2	6	1
GTGGC-motif	part of a light responsive element																																							2
H-box																		1	1
HD-Zip 1	element involved in differentiation of the palisade mesophyll cells															1	1			1	1	1												1
HD-Zip 3	protein binding site													1									1									1
HMG-TATA-region	cis-acting regulatory element	1
I-box	part of a light responsive element	2				2					2					1	1	1		1	1			1	4		1		1	1		1			1			1
LAMP-element	part of a light responsive element									1					1	1	1							1							1					1				1
LTR	cis-acting element involved in low-temperature responsiveness				1	2		2			2	1	2	2	1	1	1	1	2		1		1		1		3		1			1			1	2	1	1	1	2
MBS	MYB binding site involved in drought-inducibility	1	1	2		2			2	1		1			1			1	1	6	3	3	1				1	2					1	1		2		3	1
MBSI	MYB binding site involved in flavonoid biosynthetic genes regulation								1														1																	1
MRE	MYB binding site involved in light responsiveness					1			2		1	2	1	1		2	2				1	1	1		2							2				1		2
MYB		9	11	16	2	7	5	7	9	6	6	10	8	2	1	4	4	6	2	8	10	7	6	1	5	3	4	10		3	6	5	10	6	3	3	4	12	4	4
MYB recognition site					1	1					1			1				1			1		1					1					1	1		1		1
Myb-binding site			1	1			1	2			2	2	3	1				1			1	1	2		1	1		2		1				1	1	1	1			2
MYB-like sequence		1	5	6	2	2	2	1	3	2		1	4			2	2	4		1		1	1			2	1	2			3	2	3				1	2	1	1
MYC		1	4	4	3	2	2	6	6	5	3	4	1	11	2	1	1	6	8	8	6	10	3	5	2		2	2	4	4	5	7	2	3	4	3	6	23	2	2
O2-site	cis-acting regulatory element involved in zein metabolism regulation	1			1						1	1		1	2				2	2	1		2	1					2	3	1		1	1			2	3
P-box	gibberellin-responsive element				2			1	1	2			1		1	1	1	1						1	1	2		1										3		1
Pc-CMA2a	part of a light responsive element																																		1
plant_AP-2-like																												1
re2f-1								1		1																									1
RY-element	cis-acting regulatory element involved in seed-specific regulation																														1
Sp1	light responsive element						1						1					2								1			1				1		1				1	2
STRE		4	4	4	4	1	2	2	5	6	1		5	4	15	4	4	7	8	5	3	2	8	6	7	3	2	1	4	1	5	2	8	1	11	13	12	8	6	4
TATA		1		1			1			1	1											1		1		2										1
TATA-box	core promoter element around -30 of transcription start	33	19	36	20	9	28	10	29	31	34	39	12	24	12	47	47	17	35	13	18	13	6	12	16	76	43	52	39	31	20	29	15	26	14	17	9	126	10	16
TATC-box	cis-acting element involved in gibberellin-responsiveness				1					1						1	1					1				1	1	1		1		1
TCA			1			1	1	2		3			1		1								1				1		2		1				2			1
TCA-element	cis-acting element involved in salicylic acid responsiveness	1				3	1	1		1	1	1			1					1				2	1		1	1		1	1						1	4
TCCC-motif	part of a light responsive element	1		1		2		2				1		1	1			2			2				6			1				1		1		5		1
TC-rich repeats	cis-acting element involved in defense and stress responsiveness			2				1				1		1							1			1								1	1					4
TCT-motif	part of a light responsive element	1							1		2			4	1	1	1	1					1	1	2	2	1		2	1	1	1	2	2	1			3	1
TGACG-motif	cis-acting regulatory element involved in the MeJA-responsiveness		2		4	3	2		2	1	1	3	1		2			1	4	1	1	1	2	41	1	1	2	2		1	2		2	1	4	2	3		5	3
TGA-element	auxin-responsive element		2		1	1	1				1		1	1								1														1	1	1		1
Unnamed__1	60K protein binding site		1	4	3	3	1		4	2	1	3	3	3	1				3	3	3		7	3	1	1	1	3	2			1	1		2	5	8	1	10	10
Unnamed__10			1	1
Unnamed__12			1	1
Unnamed__14			1	1
Unnamed__16																					1
Unnamed__2							1		1		2		1			1	1				1				1			1										1
Unnamed__4		12	13	13	14	16	13	16	13	22	10	15	10	11	17	15	15	29	15	5	11	10	19	20	32	11	8	11	13	12	15	12	13	9	31	32	25	23	16	11
Unnamed__6																			1			1					2	1								1		1
Unnamed__8			1	1
W box		4	1	1		1	2	1					3	1	1			1		1	1	1		2	2			1	3			3				2		6
WRE3			1	1		2			2	2		1	1			1	1	1	1	2	1	1	1	1	2	1	1		1		1	4	1	2	5		1	3	1	2
WUN-motif	wound-responsive element				1			1		1		1	3	1											1		3			1	1	1	1	2				2

## Sheet: Table S5
Table S5. Primers used in the article.
Gene	Primers	Note
PaBBX23	F:GATTAGGGAATAAGAAACGGCG R:GGTTGTGAGAATAAACTCTTGTGG	For gene clone
PaBBX22-2	F:TCTGATAGAGGAGCAGGAGTTGAT R:CCTAAAAACACATGCCTGACAAG	For gene clone
PaBBX1-1	F:AGACCAGACCCCGGATCAAG R:GGACAATGCCGTAACCGCTT	For qRT-PCR
PaBBX1-2	F:ACTCGGCTAACCCTCTTGCT R:GCGTCATGAACCCATCCTCC	For qRT-PCR
PaBBX1-3	F:AGACCAGACCCCGGATCAAG R:GCCATAACCACCTTCCGCAA	For qRT-PCR
PaBBX4	F:GGTTTGGACAGGGAAGCGAG R:AGACGGGAAGAGCCGATCAA	For qRT-PCR
PaBBX5-1	F:GGACAACAGTAATGCGATGGGCG R:GCGTAGGCTTTCCTCGATGCGT	For qRT-PCR
PaBBX5-2	F:TCTGGATGTGCGAGGTGTGTGAG R:ACGAGACCGTCGGGAACTAGGAGG	For qRT-PCR
PaBBX7	F:TTGTCCTGGAACGAAAGCCC R:GTCCAGCCAAGGATCCCTCT	For qRT-PCR
PaBBX8-1	F:TTAAAGTGACGCAGCCAGCA R:CTCTCTCCGGTCAAGCCAGA	For qRT-PCR
PaBBX8-2	F:GATCCTCTTCAATGCCTGCACC R:GTCCAGAGACTTTTGCTCCAGG	For qRT-PCR
PaBBX9-1	F:TGCCTCGCAGGATGTAATGTCTA R:TCACAACAGGAGGAATTGCCGA	For qRT-PCR
PaBBX9-2	F:CCACAGGGCATGGTGTCTATAA R:GGAATCACAAGGCTCCAACTCAT	For qRT-PCR
PaBBX10	F:TGCCGACATCCTCAAGGTCT R:AGCTGGACTTTTGCACTGCC	For qRT-PCR
PaBBX11-1	F:CCCTCTGTGTCTGAGTTGTCGTCC R:TAACCAGTCCCATCCGCTCATAAAT	For qRT-PCR
PaBBX11-2	F:AGGGGAGGCGATGAAGGAATAGAG R:CCGTCGAACAGCAAATGGTAGC	For qRT-PCR
PaBBX11-3a/b	F:TCGAGGGGTTTTCTGGGTGT R:TCAACCTCCTCCCCAAGCAA	For qRT-PCR
PaBBX12	F:CTGATGGTGCCAAATGGGAACG R:CTACAAGGCGTCTCAGGACCCAAT	For qRT-PCR
PaBBX13	F:CCAGTTTTTCTTAGATTTGGCAGGGT R:GAACGGAGATGCTTACGAGACAGG	For qRT-PCR
PaBBX15-1	F:ACCAGGGATTCACCCGTAAAGC R:GAGAGGGAGTGGGTTCGGCAT	For qRT-PCR
PaBBX15-2	F:TCCACTCCGCCAACTCTTTAGC R:TGAAACCCTGGTGCCACGC	For qRT-PCR
PaBBX15-3	F:AACATCAATATGGAGATCTGGGAGGAC R:TGCCAAGGACTCCCTCTTTACAA	For qRT-PCR
PaBBX19-1	F:ACAGGATCAGCAGCCTAAACC R:GCACAGTGTGGCCTAGTGTT	For qRT-PCR
PaBBX19-2	F:AGATGAGAGGGAGGGAGGGA R:ATCAGCAAGCCCGACTCGTA	For qRT-PCR
PaBBX19-3	F:TTGCTGATCCCAGTGATGTTCC R:TGGGTTCTTTTACCTCCAACATGT	For qRT-PCR
PaBBX19-4	F:ACAAGTCACAGATTCACAAAGCCA R:GGATCTGCCACACCAATATACAT	For qRT-PCR
PaBBX21-1	F:CGAGAGTGCGACCATTCCAT R:TTTGTACAGGGAGCGACAGC	For qRT-PCR
PaBBX21-2	F:CTCAAGTTCGTCAAGCCCCAC R:ACCATCGTCTATCCATCGTTTCG	For qRT-PCR
PaBBX21-3	F:CCACCTCATCCTCCAACGAC R:AAAGTCGTCGACCTGCCATC	For qRT-PCR
PaBBX22-1	F:TATTCCTGAGTGGCCGCCATTAG R:TCTCCCAGCCTCCCATTATCAGC	For qRT-PCR
PaBBX22-2	F:GGAGGCACCACAATGGGAAGTAT R:GACCCAAGTGCTCGTCAACATCC	For qRT-PCR
PaBBX22-3	F:ATGTGAGGCAGCAAAAGCAATC R:CATCCACAACTTCCCTCCCAAA	For qRT-PCR
PaBBX23	F:GCACTTCAACCGTCAACTGTCA R:TCCGACACTTCTTACCAGCAGG	For qRT-PCR
PaBBX24	F:CCAACAAGCTCCCTCGATGC R:TGGGTGGCTTCAAACAGCTC	For qRT-PCR
PaBBX25	F:TCTGCCGAGTTTGGAGAGCT R:TGGGTCTGTATACGGTGGCA	For qRT-PCR
PaBBX28/29-1	F:TTCAGTAGTGGCGGGAGAGG R:ACGAGCAGCCGAGATCATCT	For qRT-PCR
PaBBX28/29-2	F:GAGAGAATCAGGTGGTTCCGTGG R:CGTGTTGTTGTTTGGGTGAGAAG	For qRT-PCR
PaBBX28/29-3	F:CCACATCTTCTGCCCCGTTC R:CGGCTGTAGGGTCTTTGCTC	For qRT-PCR
PaBBX32-1	F:TCAAACAGAGCATTCAGCCCAA R:ATAACCAAAGCGACGAAGCGAG	For qRT-PCR
PaBBX32-2	F:ATTGGTGCAGAAAGCTGGGG R:TGGAAGCTGATCTCCCCTCG	For qRT-PCR
PaTPI	F:TGATTCCCAAGTTTAAGCACTCTTC R:GCCACAACAAGGATTATTTATGGAG	For qRT-PCR
